# Supplementary material for: Similarity Evaluation on the Compound TCM Formulation “Huoling Shengji Granule” and Its Placebo by Intelligent Sensory Evaluation Technologies and the Human Sensory Evaluation Method Based on Critical Quality Attributes
Source: Hindawi journal article supplement (doi:10.1155/2021/6637326), 2021-04-14
Supplement: f1 [file 6637326.f1.zip]

|                    |         |            |                  |
|--------------------|---------|------------|------------------|
| HLG                | placebo | HLG soluti | placebo solution |
| color card r 2310C | 2312C   | 1605C      | 1603C            |
