# Supplementary material for: Similarity Evaluation on the Compound TCM Formulation “Huoling Shengji Granule” and Its Placebo by Intelligent Sensory Evaluation Technologies and the Human Sensory Evaluation Method Based on Critical Quality Attributes
Source: Hindawi journal article supplement (doi:10.1155/2021/6637326), 2021-04-14
Supplement: f1 [file 6637326.f1.zip]

Results of the Huoling shengji Granules and Placebo

| Visual indicators    | HLG Granules 160301 | placebo 18041801 |
|----------------------|---------------------|------------------|
| R means              | 76.0065             | 65.6489          |
| G means              | 62.8133             | 54.4878          |
| B means              | 47.8231             | 40.5399          |
| R variance           | 191.3295            | 154.5817         |
| G variance           | 180.3956            | 149.4524         |
| B variance           | 167.7381            | 139.6748         |
| R standard deviation | 13.8322             | 12.4331          |
| G standard deviation | 13.4311             | 12.2251          |
| B standard deviation | 12.9514             | 11.8184          |
| similarity           | 1                   |                  |

The results of HSV visual indicators of the

| Visual indicators    | HLG Granules 160301 | placebo 18041801 |
|----------------------|---------------------|------------------|
| H means              | 0.0885              | 0.0923           |
| S means              | 0.3819              | 0.3951           |
| V means              | 0.2981              | 0.2574           |
| H variance           | 9.33E-05            | 0.0001           |
| S variance           | 0.0057              | 0.0066           |
| V variance           | 0.0029              | 0.0021           |
| H standard deviation | 0.0097              | 0.0115           |
| S standard deviation | 0.0754              | 0.081            |
| V standard deviation | 0.0542              | 0.0488           |
| similarity           | 0.998               |                  |

The Results of gray value color difference measurement of the Huoling shengji Granules and Placebo

| Number     | Sample name | Pixel mean (SRM) |
|------------|-------------|------------------|
| 1          | placebo 18  | 63.6911          |
| 2          | placebo 18  | 65.4073          |
| 3          | placebo 18  | 65.7234          |
| 4          | the Huoling | 70.0089          |
| 5          | the Huoling | 70.4311          |
| 6          | the Huoling | 70.6591          |
| similarity |             | 0.9999           |

Results of the Huoling shengji Granules and Placebo

| Visual indicators    | HLG solution 160301 | placebo solution 18041801 |
|----------------------|---------------------|---------------------------|
| R means              | 13.7884             | 16.5445                   |
| G means              | 11.1897             | 14.4673                   |
| B means              | 11.7198             | 13.7709                   |
| R variance           | 4.9177              | 2.0422                    |
| G variance           | 2.8295              | 1.9044                    |
| B variance           | 2.2902              | 2.1784                    |
| R standard deviation | 2.2176              | 1.4291                    |
| G standard deviation | 1.6821              | 1.38                      |
| B standard deviation | 1.5133              | 1.4759                    |
| similarity           | 0.9973              |                           |

The results of HSV visual indicators of the

| Visual indicators    | HLG solution 160301 | placebo solution 18041801 |
|----------------------|---------------------|---------------------------|
| H means              | 0.7255              | 0.3938                    |
| S means              | 0.2027              | 0.1884                    |
| V means              | 0.0541              | 0.0649                    |
| H variance           | 0.1341              | 0.1635                    |
| S variance           | 0.0045              | 0.0032                    |
| V variance           | 7.52E-05            | 3.14E-05                  |
| H standard deviation | 0.3662              | 0.4043                    |
| S standard deviation | 0.0672              | 0.0566                    |

|            |        |        |        |        |
|------------|--------|--------|--------|--------|
| V standard | 0.0087 | 0.0063 | 0.0072 | 0.0056 |
| similarity | 0.9916 |        |        |        |
