# Supplementary material for: Similarity Evaluation on the Compound TCM Formulation “Huoling Shengji Granule” and Its Placebo by Intelligent Sensory Evaluation Technologies and the Human Sensory Evaluation Method Based on Critical Quality Attributes
Source: Hindawi journal article supplement (doi:10.1155/2021/6637326), 2021-04-14
Supplement: f1 [file 6637326.f1.zip]

smell

| HLG       | placebo   |
|-----------|-----------|
| 3.5       | 3         |
| 4         | 2.5       |
| 3.5       | 3         |
| 4         | 3.5       |
| 3.5       | 2         |
| 3.5       | 1.5       |
| 3.67±0.26 | 2.58±0.74 |

appearance

| HLG       | placebo   |
|-----------|-----------|
| 3.5       | 3.5       |
| 3.5       | 3.5       |
| 4         | 3         |
| 3.5       | 3         |
| 3.5       | 3         |
| 4         | 3.5       |
| 3.67±0.26 | 3.25±0.27 |

color

clarity

| HLG       | placebo  |
|-----------|----------|
| 4         | 3.5      |
| 3.5       | 3.5      |
| 3.5       | 3        |
| 3         | 4        |
| 3.5       | 3.5      |
| 3         | 3.5      |
| 3.42±0.38 | 3.5±0.32 |

taste

| HLG       | placebo   |
|-----------|-----------|
| 3.5       | 3         |
| 3.5       | 2.5       |
| 4         | 2         |
| 4         | 3         |
| 3.5       | 3.5       |
| 3.5       | 3.2       |
| 3.67±0.26 | 2.87±0.54 |

| HLG       | Placebo   |     |
|-----------|-----------|-----|
|           | 3.5       | 4   |
|           | 3.5       | 3.5 |
|           | 4         | 3.5 |
|           | 4         | 3   |
|           | 3.5       | 3   |
|           | 4         | 3.5 |
| 3.75±0.27 | 3.42±0.38 |     |
