# Supplementary material for: Similarity Evaluation on the Compound TCM Formulation “Huoling Shengji Granule” and Its Placebo by Intelligent Sensory Evaluation Technologies and the Human Sensory Evaluation Method Based on Critical Quality Attributes
Source: Hindawi journal article supplement (doi:10.1155/2021/6637326), 2021-04-14
Supplement: f1 [file 6637326.f1.zip]

|              | Placebo | Placebo | Placebo | means $\pm$ sta | HLG soluti | HLG soluti | HLG soluti | means $\pm$ sta |
|--------------|---------|---------|---------|-----------------|------------|------------|------------|-----------------|
| density      | 1.0206  | 1.0118  | 1.021   | 1.02 $\pm$ 0.01 | 1.019      | 1.0189     | 1.0238     | 1.02 $\pm$ 0    |
| viscosity    | 1.8     | 1.8     | 1.8     | 1.8 $\pm$ 0     | 1.92       | 1.8        | 1.9        | 1.87 $\pm$ 0.06 |
| Dissolubilit | 0.92    | 0.95    | 0.95    | 0.94 $\pm$ 0.02 | 0.99       | 0.97       | 0.95       | 0.97 $\pm$ 0.02 |
| PH           | 4.64    | 4.67    | 4.66    | 4.66 $\pm$ 0.02 | 4.64       | 4.66       | 4.65       | 4.65 $\pm$ 0.01 |
